# Supplementary material for: Relationship between Bone Stability and Egg Production in Genetically Divergent Chicken Layer Lines
Source: MDPI journal article supplement (doi:10.3390/ani10050850), 2020-05-14
Supplement: s1 [file s1]

## Supplementary Material

**Table S5.** Sample sizes for the analysis.

| Variable                           | Total | Layer Line |     |     |     |
|------------------------------------|-------|------------|-----|-----|-----|
|                                    |       | WLA        | R11 | BLA | L68 |
| Laying maturity                    | 524   | 129        | 134 | 133 | 128 |
| Total number of eggs               | 524   | 129        | 134 | 133 | 128 |
| Egg weight                         | 524   | 129        | 134 | 133 | 128 |
| Eggshell weight                    | 524   | 129        | 134 | 133 | 128 |
| Eggshell proportion                | 524   | 129        | 134 | 133 | 128 |
| Total eggshell production          | 524   | 129        | 134 | 133 | 128 |
| Daily feed consumption             | 513   | 128        | 131 | 129 | 125 |
| Feed-to-egg-conversion rate        | 513   | 128        | 131 | 129 | 125 |
| Feed-to-eggshell conversion rate   | 513   | 128        | 131 | 129 | 125 |
| Bone breaking strength Tibiotarsus | 518   | 126        | 134 | 131 | 127 |
| Bone mineral density Tibiotarsus   | 524   | 129        | 134 | 133 | 128 |
| Weight Tibiotarsus                 | 524   | 129        | 134 | 133 | 128 |
| Length Tibiotarsus                 | 524   | 129        | 134 | 133 | 128 |
| Thickness Tibiotarsus              | 524   | 129        | 134 | 133 | 128 |
| Bone breaking strength Humerus     | 516   | 128        | 131 | 132 | 125 |
| Bone mineral density Humerus       | 519   | 129        | 134 | 128 | 128 |
| Weight Humerus                     | 521   | 127        | 134 | 132 | 128 |
| Length Humerus                     | 523   | 129        | 134 | 132 | 128 |
| Thickness Humerus                  | 523   | 129        | 134 | 132 | 128 |
| Body weight at hatch               | 523   | 129        | 133 | 133 | 128 |
| Body weight at week 21             | 524   | 129        | 134 | 133 | 128 |
| Body weight at week 25             | 524   | 129        | 134 | 133 | 128 |
| Body weight at week 49             | 524   | 129        | 134 | 133 | 128 |
| Body weight at week 69             | 524   | 129        | 134 | 133 | 128 |
