# Supplementary material for: Relationship between Bone Stability and Egg Production in Genetically Divergent Chicken Layer Lines
Source: MDPI journal article supplement (doi:10.3390/ani10050850), 2020-05-14
Supplement: s1 [file s1]

## Supplementary Material

**Table S1.** Light program and mean climatic conditions.

| Week of<br>age | Time    |         | Day length (h) | Light intensity<br>(Lux) | Temperature (°C) | Relative humidity<br>(%) |
|----------------|---------|---------|----------------|--------------------------|------------------|--------------------------|
|                | Start   | End     |                |                          |                  |                          |
| Day 1          | -       | -       | 24.0           | 20.0                     | 27.0             | 66.0                     |
| 1              | 4:00 am | 7:00 pm | 15.0           | 20.0                     | 27.6             | 64.8                     |
| 2              | 4:30 am | 7:00 pm | 14.5           | 20.0                     | 26.4             | 67.9                     |
| 3              | 5:30 am | 7:00 pm | 13.5           | 20.0                     | 24.5             | 66.8                     |
| 4              | 6:00 am | 7:00 pm | 13.0           | 20.0                     | 22.1             | 68.5                     |
| 5              | 7:00 am | 7:00 pm | 12.0           | 20.0                     | 19.4             | 69.0                     |
| 6              | 7:00 am | 6:00 pm | 11.0           | 10.0                     | 18.2             | 75.3                     |
| 7              | 7:00 am | 5:00 pm | 10.0           | 10.0                     | 18.8             | 77.8                     |
| 8              | 7:30 am | 4:30 pm | 9.0            | 10.0                     | 18.4             | 73.1                     |
| 9              | 7:30 am | 3:30 pm | 8.0            | 10.0                     | 18.2             | 76.1                     |
| 10             | 7:30 am | 3:30 pm | 8.0            | 10.0                     | 18.0             | 75.6                     |
| 11             | 7:30 am | 3:30 pm | 8.0            | 10.0                     | 18.2             | 76.4                     |
| 12             | 7:30 am | 3:30 pm | 8.0            | 10.0                     | 18.2             | 77.4                     |
| 13             | 7:30 am | 3:30 pm | 8.0            | 10.0                     | 18.8             | 78.7                     |
| 14             | 7:30 am | 3:30 pm | 8.0            | 10.0                     | 18.7             | 78.6                     |
| 15             | 7:30 am | 3:30 pm | 8.0            | 10.0                     | 18.1             | 78.8                     |
| 16             | 7:30 am | 3:30 pm | 8.0            | 10.0                     | 18.3             | 53.1                     |
| 17             | 7:00 am | 3:30 pm | 8.5            | 10.0                     | 18.1             | 54.0                     |
| 18             | 6:30 am | 3:30 pm | 9.0            | 10.0                     | 17.5             | 63.7                     |
| 19             | 6:30 am | 4:00 pm | 9.5            | 10.0                     | 17.8             | 54.8                     |
| 20             | 5:30 am | 4:00 pm | 10.5           | 10.0                     | 18.3             | 61.2                     |
| 21             | 4:30 am | 4:00 pm | 11.5           | 10.0                     | 18.0             | 62.6                     |
| 22             | 4:00 am | 4:30 pm | 12.5           | 10.0                     | 17.8             | 62.3                     |
| 23             | 3:30 am | 5:00 pm | 13.5           | 10.0                     | 17.8             | 58.9                     |
| 24 - 69        | 3:30 am | 5:30 pm | 14.0           | 10.0                     | -                | -                        |
