# Supplementary material for: Relationship between Bone Stability and Egg Production in Genetically Divergent Chicken Layer Lines
Source: MDPI journal article supplement (doi:10.3390/ani10050850), 2020-05-14
Supplement: s1 [file s1]

## Supplementary Material

**Table S3.** Ingredients and analysed nutrient compositions of the experimental layer diets of the first and second generations.

| Diet                               | Layers        |         | Layers         |         |
|------------------------------------|---------------|---------|----------------|---------|
|                                    | 300 IU Vit D3 |         | 3000 IU Vit D3 |         |
| Generation                         | 1             | 2       | 1              | 2       |
| <b>Ingredients (%)</b>             |               |         |                |         |
| Wheat                              | 39.80         | 39.74   | 39.80          | 39.74   |
| Corn                               | 20.00         | 20.00   | 20.00          | 20.00   |
| Soybean, toasted                   | 10.63         | 10.63   | 10.63          | 10.63   |
| Soybean meal, toasted              | 8.00          | 8.00    | 8.00           | 8.00    |
| High protein soybean meal, toasted | 5.00          | 5.00    | 5.00           | 5.00    |
| Lucerne pellets                    | 2.44          | 2.44    | 2.44           | 2.44    |
| Soybean oil                        | 2.00          | 2.00    | 2.00           | 2.00    |
| Calcium phosphate                  | 2.16          | 2.46    | 2.16           | 2.46    |
| Calcium carbonate                  | 7.53          | 8.15    | 7.53           | 8.15    |
| Sodium chloride                    | 0.29          | 0.42    | 0.29           | 0.42    |
| DL-Methionine                      | 0.15          | 0.16    | 0.15           | 0.16    |
| Silica (Sipernat®)                 | 1.00          | -       | 1.00           | -       |
| Premix 74237                       | 1.00          | 1.00    | -              | -       |
| Premix 74118                       | -             | -       | 1.00           | 1.00    |
| <b>Nutrient composition</b>        |               |         |                |         |
| Crude protein (%)                  | 15.90         | 16.80   | 15.80          | 17.10   |
| Crude fat (%)                      | 5.60          | 6.20    | 6.20           | 6.20    |
| Starch (%)                         | 40.70         | 38.40   | 38.90          | 38.00   |
| Sucrose (%)                        | 3.60          | 3.00    | 4.00           | 3.40    |
| ME / kg DM (MJ)                    | 11.60         | 11.50   | 11.60          | 11.60   |
| Vitamin D3 (IU / kg)               | 430.00        | 2000.00 | 2240.0         | 3400.00 |
| Calcium (%)                        |               |         | 3.38           |         |
| Phosphorus (%)                     |               |         | 0.65           |         |
| Natrium (%)                        |               |         | 0.26           |         |
