# Supplementary material for: Relationship between Bone Stability and Egg Production in Genetically Divergent Chicken Layer Lines
Source: MDPI journal article supplement (doi:10.3390/ani10050850), 2020-05-14
Supplement: s1 [file s1]

## Supplementary Material

**Table S2.** Calculated nutrient compositions of the diets fed to the chicks during the first and second generations, respectively, and of the diet fed to the pullets during both generations.

| Diet                 | Chicks  |         | Pullets |
|----------------------|---------|---------|---------|
|                      | 1       | 2       | 1 + 2   |
| Crude protein (%)    | 21.00   | 21.00   | 15.50   |
| Crude fat (%)        | 4.00    | 4.00    | 4.00    |
| Crude fibre (%)      | 3.20    | 3.50    | 4.50    |
| Crude ash (%)        | 6.00    | 6.00    | 5.00    |
| ME / kg DM (MJ)      | 11.80   | 11.80   | 11.40   |
| Calcium (%)          | 1.00    | 0.95    | 0.85    |
| Phosphorus (%)       | 0.70    | 0.65    | 0.55    |
| Sodium (%)           | 0.15    | 0.15    | 0.15    |
| Lysine (%)           | 1.20    | 1.20    | 0.65    |
| Methionine (%)       | 0.48    | 0.48    | 0.34    |
| Vitamin D3 (IU / kg) | 3000.00 | 3000.00 | 1950.00 |
