# Supplementary material for: Relationship between Bone Stability and Egg Production in Genetically Divergent Chicken Layer Lines
Source: MDPI journal article supplement (doi:10.3390/ani10050850), 2020-05-14
Supplement: s1 [file s1]

## Supplementary Material

**Table S4.** The effects of layer line, diet and their interaction on the observed bone traits and basic production parameters calculated within generations.

|                                    | Layer Line |         | Diet    |         | Layer Line * Diet |         |
|------------------------------------|------------|---------|---------|---------|-------------------|---------|
|                                    | F Value    | p Value | F Value | p Value | F Value           | p Value |
| <b>Generation 1</b>                |            |         |         |         |                   |         |
| Laying maturity                    | 169.42     | <0.0001 | 1.20    | 0.2743  | 0.39              | 0.7618  |
| Total number of eggs               | 346.92     | <0.0001 | 3.39    | 0.0669  | 0.55              | 0.6509  |
| Egg weight                         | 69.00      | <0.0001 | 0.68    | 0.4112  | 0.31              | 0.8152  |
| Eggshell weight                    | 95.23      | <0.0001 | 0.50    | 0.4816  | 0.59              | 0.6203  |
| Eggshell proportion                | 36.18      | <0.0001 | 3.22    | 0.0740  | 0.30              | 0.8250  |
| Total eggshell production          | 516.80     | <0.0001 | 3.22    | 0.0739  | 0.33              | 0.8041  |
| Daily feed consumption             | 76.43      | <0.0001 | 0.24    | 0.6248  | 0.58              | 0.6308  |
| Feed-to-egg conversion rate        | 234.46     | <0.0001 | 0.73    | 0.3933  | 0.58              | 0.6271  |
| Feed-to-eggshell conversion rate   | 245.59     | <0.0001 | 2.78    | 0.0967  | 0.39              | 0.7589  |
| Bone breaking strength Tibiotarsus | 120.59     | <0.0001 | 0.27    | 0.6054  | 1.60              | 0.1909  |
| Bone mineral density Tibiotarsus   | 87.07      | <0.0001 | 0.25    | 0.6155  | 2.86              | 0.0376  |
| Weight Tibiotarsus                 | 305.57     | <0.0001 | 0.05    | 0.8319  | 0.33              | 0.8005  |
| Length Tibiotarsus                 | 38.36      | <0.0001 | 0.47    | 0.4949  | 0.56              | 0.6442  |
| Thickness Tibiotarsus              | 197.36     | <0.0001 | 0.00    | 0.9924  | 0.28              | 0.8416  |
| Bone breaking strength Humerus     | 55.72      | <0.0001 | 1.66    | 0.1986  | 0.79              | 0.4994  |
| Bone mineral density Humerus       | 43.75      | <0.0001 | 2.50    | 0.1148  | 0.29              | 0.8315  |
| Weight Humerus                     | 63.97      | <0.0001 | 0.03    | 0.8599  | 0.28              | 0.8417  |
| Length Humerus                     | 62.34      | <0.0001 | 0.02    | 0.8808  | 2.02              | 0.1112  |
| Thickness Humerus                  | 40.52      | <0.0001 | 1.03    | 0.3112  | 0.70              | 0.5538  |
| Body weight 69th week of age       | 151.27     | <0.0001 | 0.03    | 0.8624  | 1.52              | 0.2097  |
| <b>Generation 2</b>                |            |         |         |         |                   |         |
| Laying maturity                    | 159.93     | <0.0001 | 1.50    | 0.2211  | 0.10              | 0.9611  |
| Total number of eggs               | 461.62     | <0.0001 | 0.16    | 0.6909  | 0.51              | 0.6781  |
| Egg weight                         | 119.07     | <0.0001 | 0.74    | 0.3890  | 0.43              | 0.7298  |
| Eggshell weight                    | 217.06     | <0.0001 | 1.05    | 0.3061  | 1.88              | 0.1341  |
| Eggshell proportion                | 55.17      | <0.0001 | 0.03    | 0.8526  | 0.53              | 0.6613  |
| Total eggshell production          | 826.22     | <0.0001 | 1.32    | 0.2524  | 2.07              | 0.1049  |
| Daily feed consumption             | 109.61     | <0.0001 | 1.52    | 0.2181  | 0.99              | 0.3997  |
| Feed-to-egg conversion rate        | 278.68     | <0.0001 | 0.28    | 0.5960  | 3.35              | 0.0197  |
| Feed-to-eggshell conversion rate   | 259.92     | <0.0001 | 0.56    | 0.4538  | 2.37              | 0.0708  |
| Bone breaking strength Tibiotarsus | 70.35      | <0.0001 | 0.03    | 0.8692  | 1.37              | 0.2536  |
| Bone mineral density Tibiotarsus   | 94.81      | <0.0001 | 0.13    | 0.7201  | 1.69              | 0.1706  |
| Weight Tibiotarsus                 | 291.45     | <0.0001 | 0.19    | 0.6649  | 0.52              | 0.6672  |
| Length Tibiotarsus                 | 21.25      | <0.0001 | 0.02    | 0.8904  | 0.08              | 0.9717  |
| Thickness Tibiotarsus              | 179.68     | <0.0001 | 0.04    | 0.8395  | 0.08              | 0.9711  |
| Bone breaking strength Humerus     | 32.15      | <0.0001 | 0.08    | 0.7807  | 1.30              | 0.2744  |
| Bone mineral density Humerus       | 56.76      | <0.0001 | 1.44    | 0.2315  | 0.19              | 0.9033  |
| Weight Humerus                     | 99.83      | <0.0001 | 0.03    | 0.8528  | 0.21              | 0.8864  |
| Length Humerus                     | 49.52      | <0.0001 | 0.01    | 0.9390  | 0.37              | 0.7765  |
| Thickness Humerus                  | 60.71      | <0.0001 | 0.53    | 0.4689  | 0.61              | 0.6062  |
| Body weight 69th week of age       | 137.20     | <0.0001 | 1.82    | 0.1786  | 2.13              | 0.0963  |
