# Supplementary material for: Relationship between Bone Stability and Egg Production in Genetically Divergent Chicken Layer Lines
Source: MDPI journal article supplement (doi:10.3390/ani10050850), 2020-05-14
Supplement: s1 [file s1]

## Supplementary Material

**Table S6.** Least squares means  $\pm$  standard errors and level of significance for body weight measured at hatching, and different weeks of age under the effect of layer line (LL), generation (Gen), and their interaction.

| Effect                                     | Body weight (g)               |                                  |                                  |                                  |                                  |
|--------------------------------------------|-------------------------------|----------------------------------|----------------------------------|----------------------------------|----------------------------------|
|                                            | Hatch                         | Week 21                          | Week 25                          | Week 49                          | Week 69                          |
| Layer line (LL)                            |                               |                                  |                                  |                                  |                                  |
| WLA                                        | 38.35 $\pm$ 0.37 <sup>a</sup> | 1420.02 $\pm$ 15.79 <sup>b</sup> | 1468.38 $\pm$ 16.19 <sup>b</sup> | 1497.54 $\pm$ 20.46 <sup>b</sup> | 1504.23 $\pm$ 22.26 <sup>c</sup> |
| R11                                        | 33.17 $\pm$ 0.36 <sup>c</sup> | 1040.84 $\pm$ 15.60 <sup>c</sup> | 1236.40 $\pm$ 15.99 <sup>c</sup> | 1309.28 $\pm$ 20.21 <sup>c</sup> | 1362.79 $\pm$ 21.99 <sup>d</sup> |
| BLA                                        | 39.35 $\pm$ 0.37 <sup>a</sup> | 1584.15 $\pm$ 15.71 <sup>a</sup> | 1663.55 $\pm$ 16.11 <sup>a</sup> | 1821.81 $\pm$ 20.34 <sup>a</sup> | 1838.10 $\pm$ 22.13 <sup>b</sup> |
| L68                                        | 34.84 $\pm$ 0.37 <sup>b</sup> | 1568.91 $\pm$ 15.81 <sup>a</sup> | 1714.92 $\pm$ 16.21 <sup>a</sup> | 1837.91 $\pm$ 20.48 <sup>a</sup> | 1923.44 $\pm$ 22.29 <sup>a</sup> |
| Generation (Gen)                           |                               |                                  |                                  |                                  |                                  |
| Gen 1                                      | 35.86 $\pm$ 0.26              | 1379.01 $\pm$ 11.17              | 1485.67 $\pm$ 11.45              | 1567.49 $\pm$ 14.47              | 1616.21 $\pm$ 15.76              |
| Gen 2                                      | 37.00 $\pm$ 0.26              | 1427.95 $\pm$ 11.07              | 1555.96 $\pm$ 11.36              | 1665.79 $\pm$ 14.34              | 1698.07 $\pm$ 15.59              |
| LL $\times$ Gen                            |                               |                                  |                                  |                                  |                                  |
| WLA $\times$ Gen1                          | 37.77 $\pm$ 0.52              | 1376.72 $\pm$ 22.36              | 1415.84 $\pm$ 22.91              | 1460.33 $\pm$ 28.96              | 1443.48 $\pm$ 31.51              |
| WLA $\times$ Gen2                          | 38.93 $\pm$ 0.52              | 1463.31 $\pm$ 22.32              | 1520.93 $\pm$ 22.88              | 1534.75 $\pm$ 28.91              | 1564.98 $\pm$ 31.45              |
| R11 $\times$ Gen1                          | 32.64 $\pm$ 0.51              | 1027.33 $\pm$ 21.99              | 1222.77 $\pm$ 22.53              | 1284.20 $\pm$ 28.49              | 1338.12 $\pm$ 31.02              |
| R11 $\times$ Gen2                          | 33.69 $\pm$ 0.52              | 1054.36 $\pm$ 22.14              | 1250.04 $\pm$ 22.71              | 1334.37 $\pm$ 28.66              | 1387.45 $\pm$ 31.17              |
| BLA $\times$ Gen1                          | 38.84 $\pm$ 0.52              | 1549.66 $\pm$ 22.41              | 1627.91 $\pm$ 22.97              | 1767.90 $\pm$ 29.03              | 1804.33 $\pm$ 31.60              |
| BLA $\times$ Gen2                          | 39.87 $\pm$ 0.51              | 1618.63 $\pm$ 22.02              | 1699.19 $\pm$ 22.59              | 1875.73 $\pm$ 28.50              | 1871.86 $\pm$ 30.98              |
| L68 $\times$ Gen1                          | 34.18 $\pm$ 0.52              | 1562.32 $\pm$ 22.61              | 1676.16 $\pm$ 23.16              | 1757.53 $\pm$ 29.31              | 1878.89 $\pm$ 31.92              |
| L68 $\times$ Gen2                          | 35.51 $\pm$ 0.51              | 1575.50 $\pm$ 22.11              | 1753.67 $\pm$ 22.68              | 1918.30 $\pm$ 28.62              | 1968.00 $\pm$ 31.12              |
| ANOVA significance level ( <i>p</i> value) |                               |                                  |                                  |                                  |                                  |
|                                            | Layer line                    | Generation                       | LL $\times$ Gen                  |                                  |                                  |
| Hatch                                      | <0.0001                       | 0.0019                           | 0.9908                           |                                  |                                  |
| Week 21                                    | <0.0001                       | 0.0020                           | 0.3097                           |                                  |                                  |
| Week 25                                    | <0.0001                       | <0.0001                          | 0.3907                           |                                  |                                  |
| Week 49                                    | <0.0001                       | <0.0001                          | 0.2486                           |                                  |                                  |
| Week 69                                    | 0.0003                        | <0.0001                          | 0.6892                           |                                  |                                  |

Means within a column with different letters differ significantly (Tukey's HSD-Test,  $p < 0.05$ ).
